# Supplementary material
Source: PubMed Central journal article supplement (PMC9127124)
Supplement: NIHMS1801485-supplement-Suppl_Data.pdf [file NIHMS1801485-supplement-Suppl_Data.pdf]

Supplementary Figure 1.

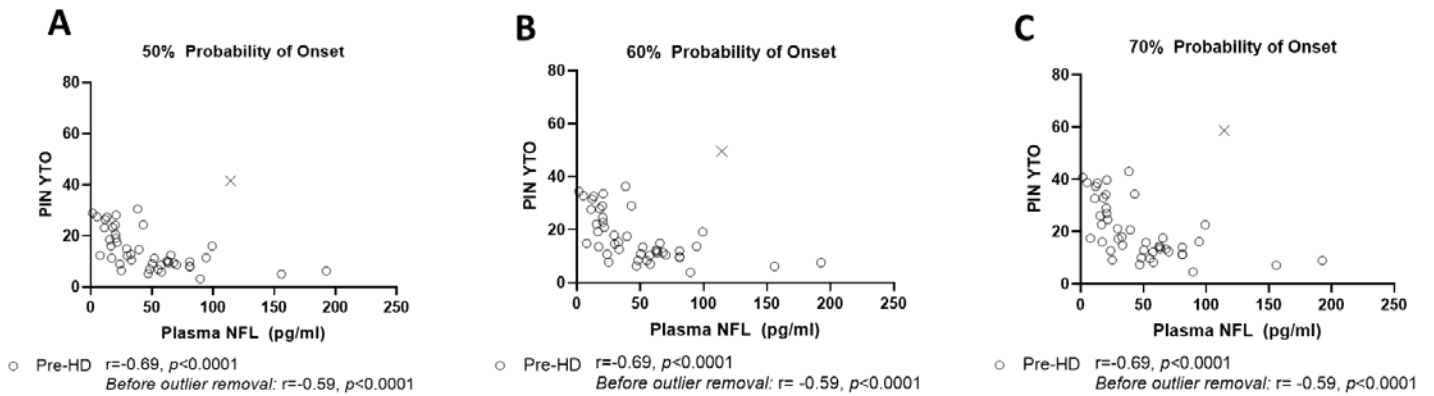

**Suppl. Figure 1.** One visual outlier, designated by an 'X' in the above graphs of plasma NfL levels compared to PIN-YTO scores in premanifest HD participants 50% (A), 60% (B) and 70% (C) probability of manifest disease onset, was excluded from all analyses.

Supplementary Figure 2.

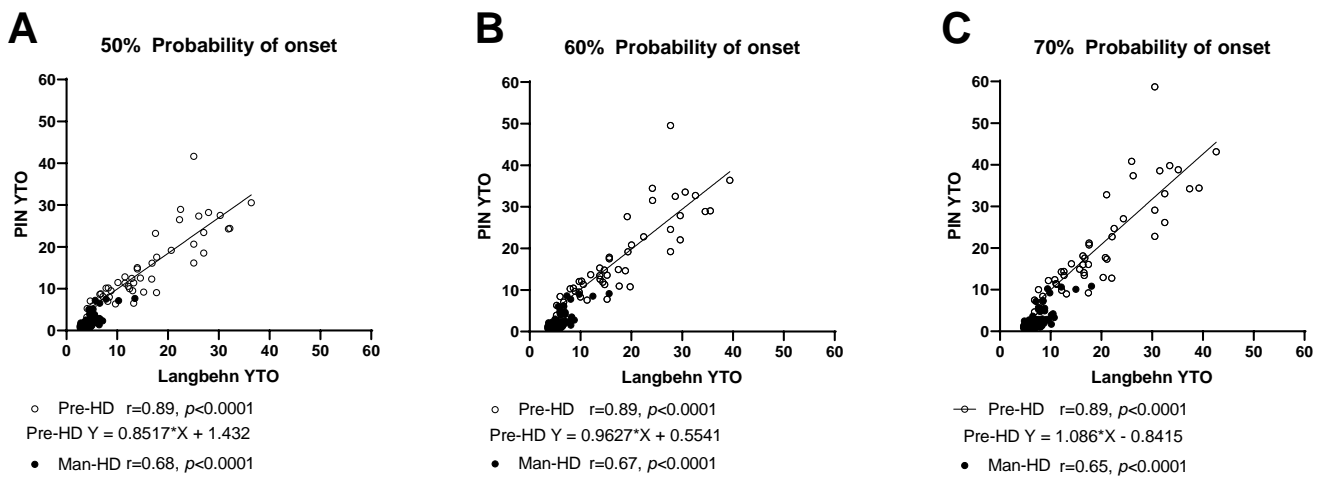

**Suppl. Figure 2.** PIN-YTO and Langbehn-YTO values were correlated at 50% (A), 60% (B) and 70% (C) probability of manifest disease onset, in premanifest HD (Pre-HD, open circles) and manifest HD (Man-HD, filled circles) participants. Linear regression lines and equation are shown for the Pre-HD cohort in each figure.

Supplementary Figure 3.

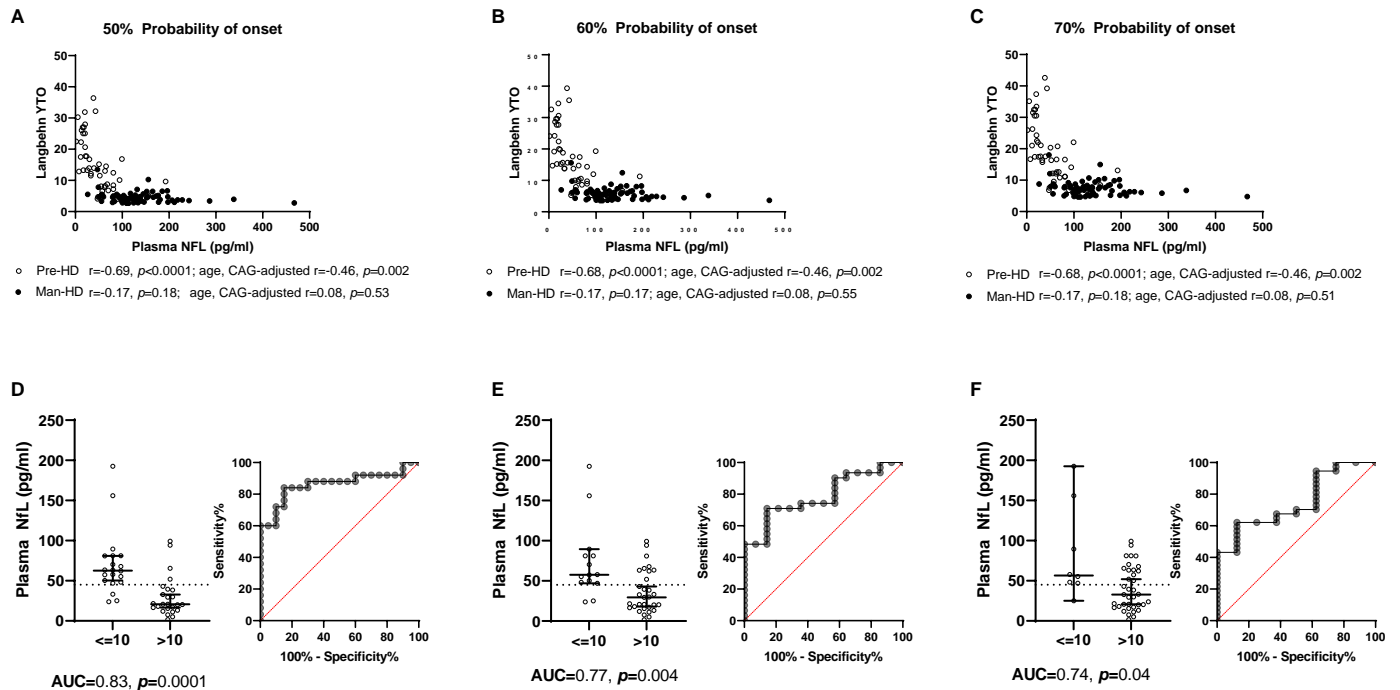

**G**

| Comparison (YTO) | Sensitivity % | Specificity % | Likelihood ratio |
|------------------|---------------|---------------|------------------|
| 50% Langbehn     | 80.00         | 100           | No overlap       |
| 50% PIN          | 84.00         | 85.00         | 5.60             |
| 60% Langbehn     | 75.00         | 100           | No overlap       |
| 60% PIN          | 70.97         | 85.71         | 4.97             |
| 70% Langbehn     | 63.16         | 100           | No overlap       |
| 70% PIN          | 62.16         | 87.5          | 4.97             |

YTO, predicted years to onset. All comparisons are shown for <45.01 pg/ml, which was the optimal value in all cases.

**Suppl. Figure 3.** Plasma NfL levels are significantly correlated with predicted years to manifest disease onset (YTO) at 50% (A), 60% (B) and 70% (C) probability in premanifest Huntington's Disease patients (Pre-HD, open circles), but not manifest HD patients (Man-HD, filled circles), determined using the Langbehn formula[1]. A plasma NfL cut-off level of 45.01 pg/ml optimally distinguished premanifest HD participants with more than 10 predicted years until manifest disease onset from those with less than 10 years, at 50% (D), 60% (E) and 70% (F) probability of manifest disease onset, determined using the Langbehn YTO formula (Langbehn et al (2010), Am J Med Genet B Neuropsychiatr Genet). Graph D-E cut-off accuracy, compared to that of the PIN-YTO (see main text, Figure 2) is specified in (G).
